# Supplementary material for: Inhaled corticosteroid withdrawal may improve outcomes in elderly patients with COPD exacerbation: a nationwide database study
Source: PubMed Central journal article supplement — ERJ Open Res. 2020 Feb 3;6(1):00246-2019. doi: 10.1183/23120541.00246-2019 (PMC6995839; doi:10.1183/23120541.00246-2019), 2020-02-03

**A** Stabilized inverse probability of treatment weighted patients with COPD aged  $\geq 40$  years

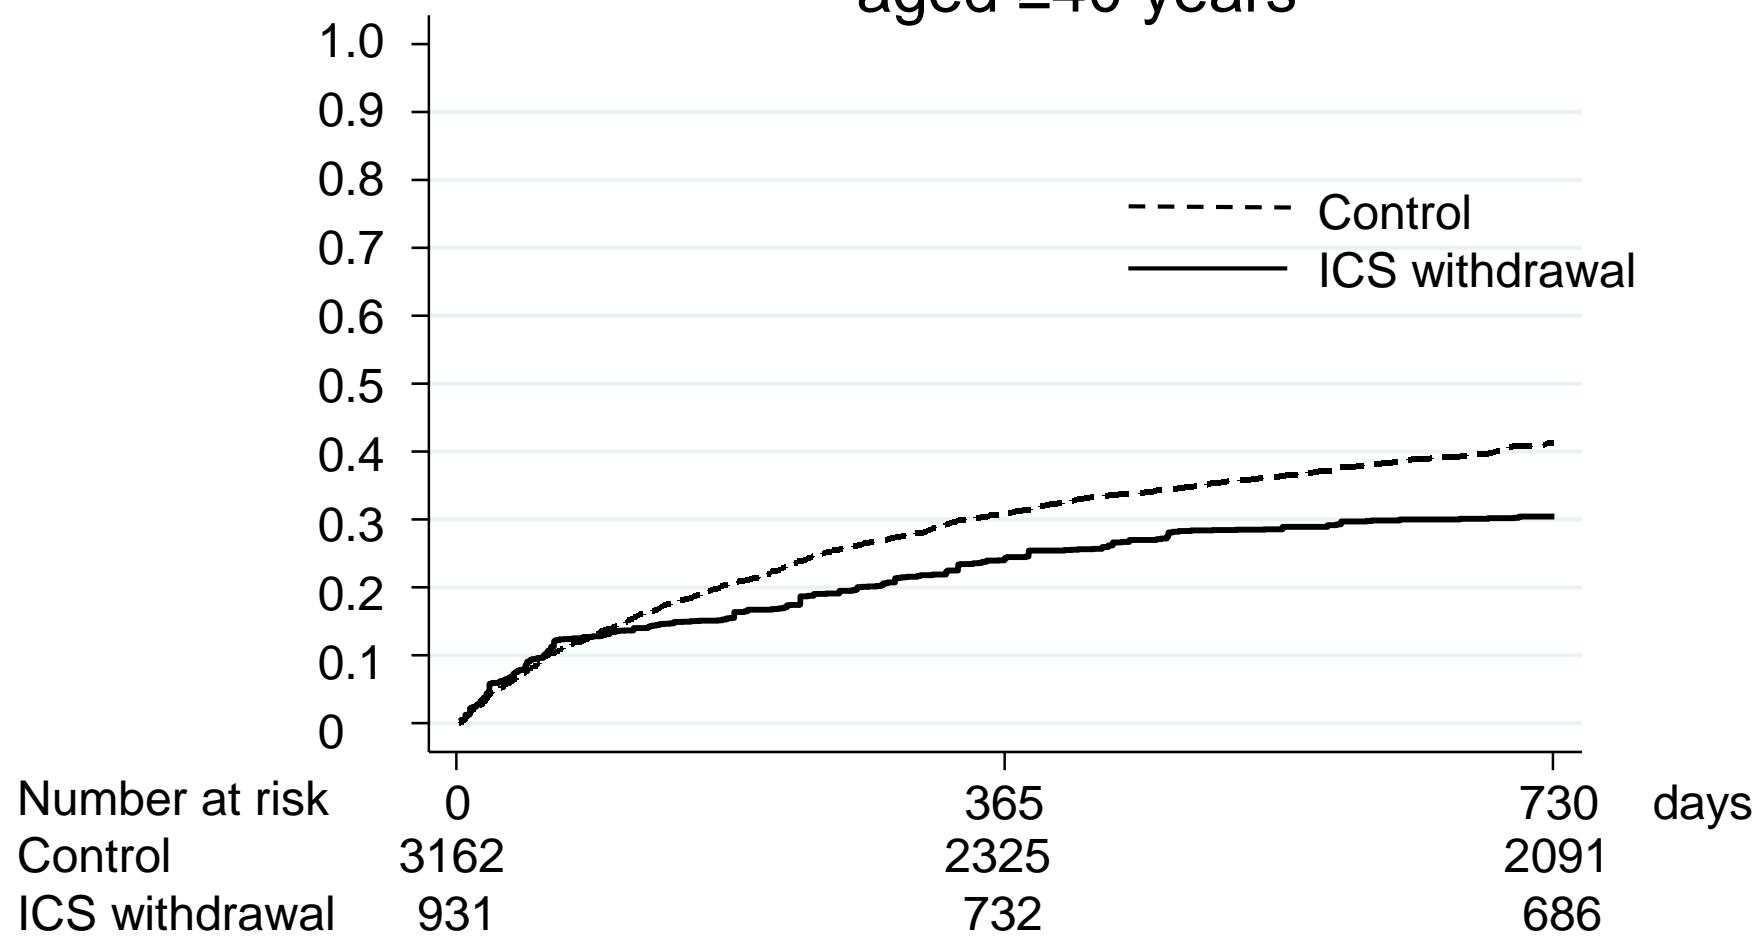

**B** Stabilized inverse probability of treatment weighted patients with COPD aged  $\geq 70$  years

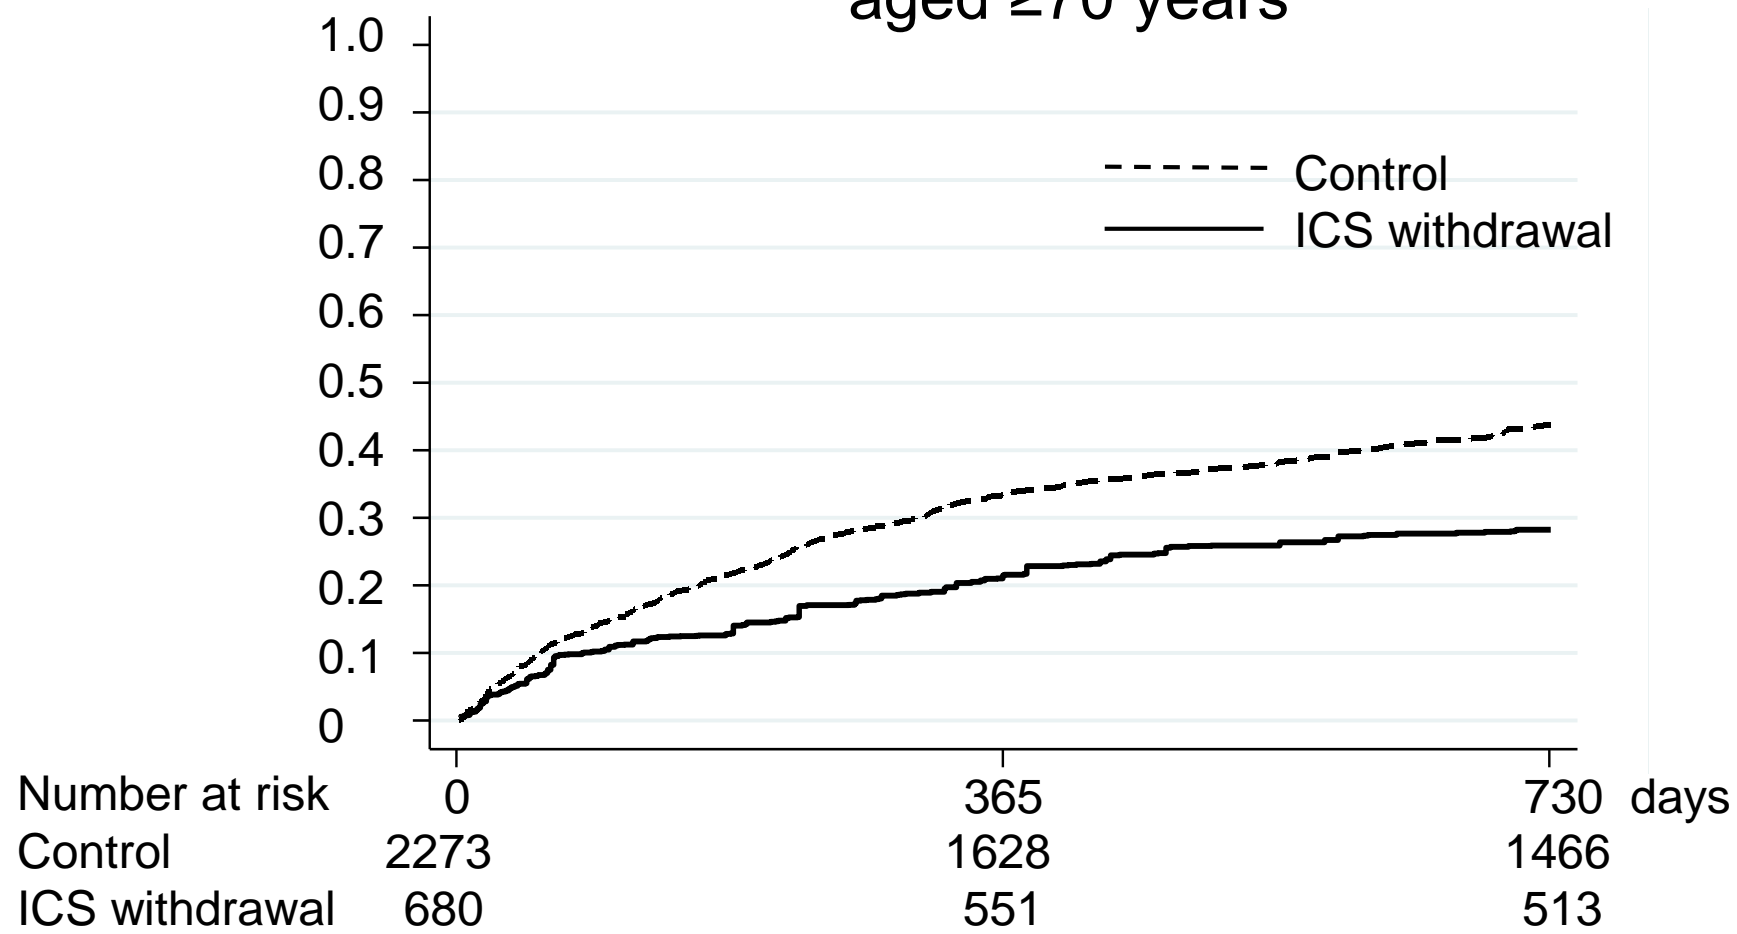

**C** Stabilized inverse probability of treatment weighted patients with COPD aged  $< 70$  years

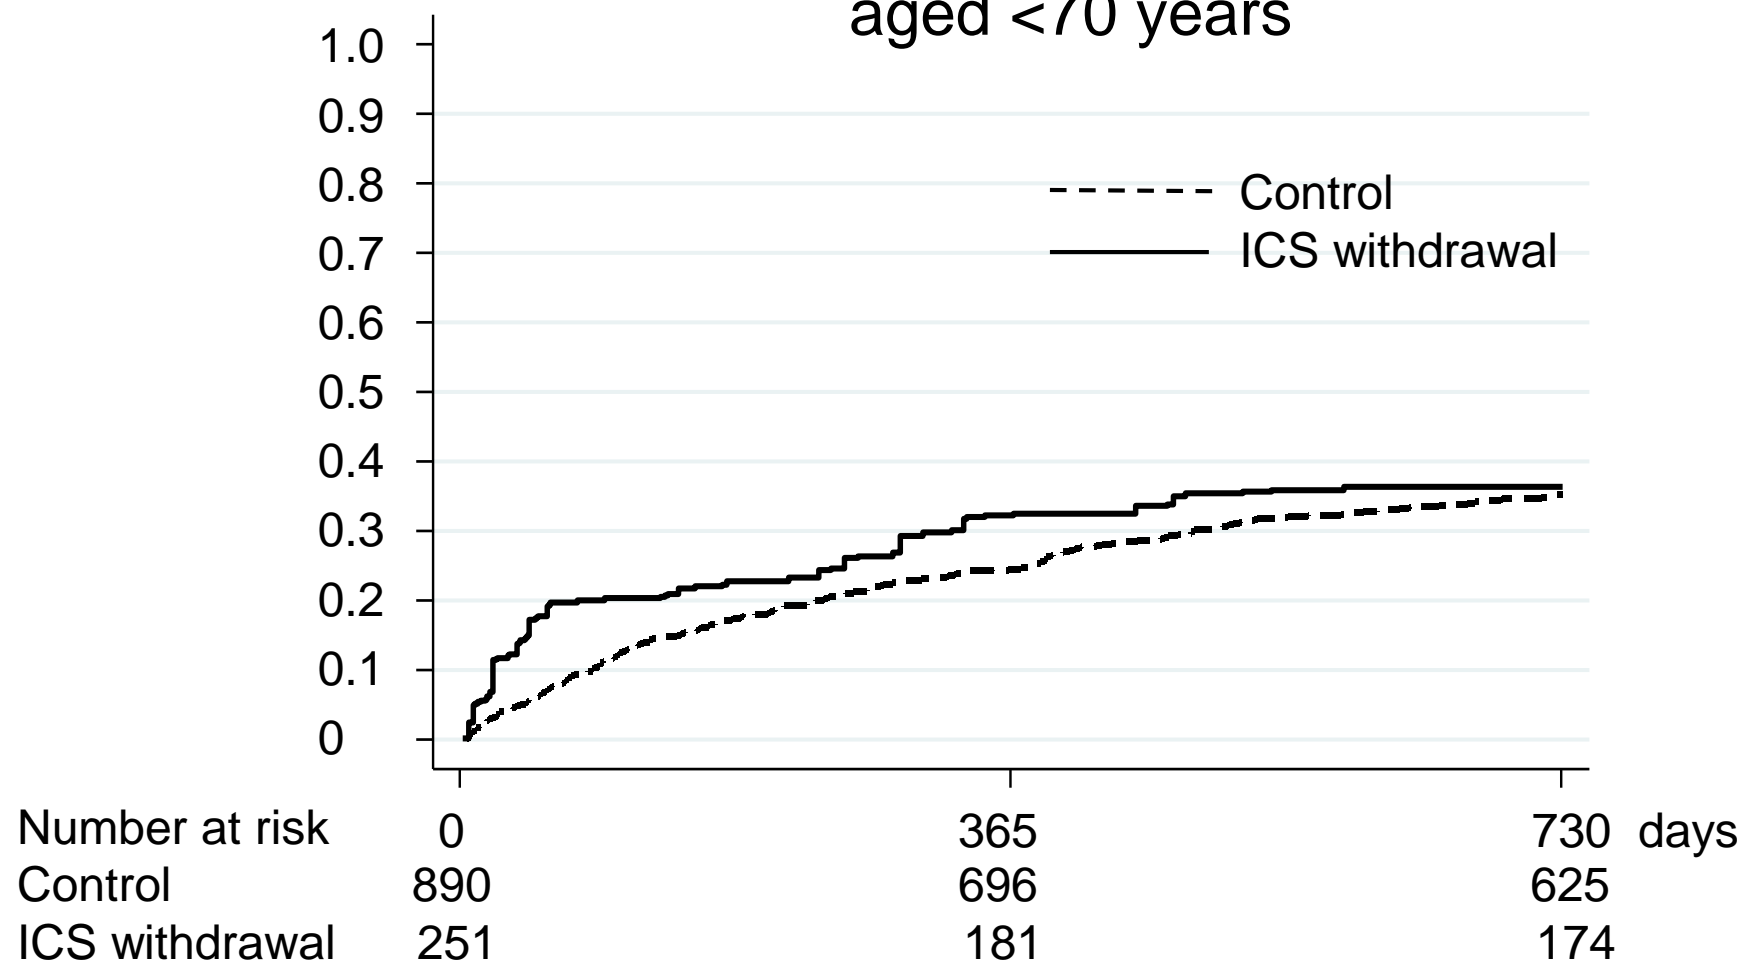

Supplement: 00246-2019.figureS3.pdf [file 00246-2019.figureS3.pdf]
