# Supplementary material for: Inhaled corticosteroid withdrawal may improve outcomes in elderly patients with COPD exacerbation: a nationwide database study
Source: PubMed Central journal article supplement — ERJ Open Res. 2020 Feb 3;6(1):00246-2019. doi: 10.1183/23120541.00246-2019 (PMC6995839; doi:10.1183/23120541.00246-2019), 2020-02-03
Supplement: 00246-2019.supptables.pdf [file 00246-2019.supptables.pdf]

**Table S1.** List of ICD-10 codes identifying comorbidities during hospitalization for COPD exacerbation

---

|                                                                                                                                          |
|------------------------------------------------------------------------------------------------------------------------------------------|
| COPD J41, J42, J43, J440, J441, J449                                                                                                     |
| COPD exacerbation J10, J11, J13, J14, J15, J16, J18, J20, J21, J22, J46, J170, J171, J178, J440, J441, J851, J12, A481, B012, B052, B250 |
| Bacterial pneumonia J100, J110, J12, J13, J14, J15, J16, J170, J178, J18, J851, A481                                                     |
| Lung cancer C34                                                                                                                          |
| Other malignancy C00-26, C30-33, C37-41, C43-58, C60-76                                                                                  |
| Diabetes/abnormal glucose tolerance E10-14, R703                                                                                         |
| Bone fracture/osteoporosis M80-84                                                                                                        |
| Interstitial pneumonia B221, J701, J704, J841, J848, J849, J990, J991, M321, M330, M331, M332, M351                                      |
| Bronchial asthma J45, J46                                                                                                                |
| Bronchiectasis J40, J41, J42, J47                                                                                                        |
| Pulmonary thromboembolism I26                                                                                                            |
| <i>Mycobacterium</i> infection A150-154, A156-159, A161-162, A165, A168-169, A19, A310, A319                                             |
| Mycotic infection A420, A43, B37, B380-382, B390-392, B400-402, B410, B420, B440, B441, B449, B460, J172                                 |
| Cor pulmonare I27                                                                                                                        |
| Congestive heart failure E059, I46, I50, I099, I110                                                                                      |
| Ischemic heart disease I20-25                                                                                                            |
| Tachycardia I47-49, R000, T818                                                                                                           |
| Autoimmune disease M05, M06, M08, M30-35                                                                                                 |
| Stroke I60-64                                                                                                                            |
| Liver dysfunction B89, B181, B182, B659, B661, K702, K703, K72, K74, K761, K762, K763, K766, K767                                        |
| Renal failure E102, E112, E142, I120, N17-19                                                                                             |
| GERD K21                                                                                                                                 |
| Constipation or ileus K56, K590                                                                                                          |
| Prostate hypertrophy N40                                                                                                                 |

---

Abbreviations: COPD, chronic obstructive pulmonary disease; GERD, gastro-esophageal reflux disease

**Table S2.** List of baseline characteristics, comorbidities, and treatments before and during hospitalization for COPD exacerbation

|                          |                                                                                                                                                                                                                                                                                                                                                                                                                                                                                                                                                                                                                                          |
|--------------------------|------------------------------------------------------------------------------------------------------------------------------------------------------------------------------------------------------------------------------------------------------------------------------------------------------------------------------------------------------------------------------------------------------------------------------------------------------------------------------------------------------------------------------------------------------------------------------------------------------------------------------------------|
| Baseline characteristics | Sex, fiscal year, season at admission, residential region, Hugh-Jones dyspnea score at admission, activities of daily living scores at both admission and discharge (Barthel Index scores), age, body mass index, smoking index, frequency of hospitalization before index hospitalization, and observation period before index hospitalization (days)                                                                                                                                                                                                                                                                                   |
| Comorbidities            | Lung cancer, other malignancy, diabetes/abnormal glucose tolerance, bone fracture/osteoporosis, interstitial pneumonia, bronchial asthma, bronchiectasis, pulmonary thromboembolism, <i>Mycobacterium</i> infection, mycosis, cor pulmonale, congestive heart failure, ischemic heart disease, tachycardia, autoimmune disease, stroke, liver dysfunction, renal failure, gastro-esophageal reflux disease, constipation and/or ileus, prostate hypertrophy                                                                                                                                                                              |
| Treatments               | Home ventilator support, home oxygen therapy, ICS before index hospitalization, LAMAs before index hospitalization, LABAs before index hospitalization, other medications for COPD before index hospitalization, ambulance transport, corticosteroid therapy during index hospitalization, mechanical ventilation during index hospitalization, nasal tube feeding during index hospitalization, surgery under general anesthesia during index hospitalization, prescription of LAMA/LABA (fixed-dose long-acting bronchodilator combination in single inhaler), LAMA, or LABA during hospitalization, discharge to home, length of stay |

Abbreviations: ICS, inhaled corticosteroids; LAMA, long-acting muscarinic receptor antagonist; LABA, long-acting beta agonist; COPD, chronic obstructive pulmonary disease

**Table S3.** List of drugs for the treatment of COPD and drugs used to identify COPD exacerbation in outpatient settings

| Drugs for the treatment of COPD          |                                                                                                                                                                                                                                                                                                                                                                                                                                                                                                                                                                                                                                                                                                                                                                                                                                                                                                                                                                                                                                                                                                                                     |
|------------------------------------------|-------------------------------------------------------------------------------------------------------------------------------------------------------------------------------------------------------------------------------------------------------------------------------------------------------------------------------------------------------------------------------------------------------------------------------------------------------------------------------------------------------------------------------------------------------------------------------------------------------------------------------------------------------------------------------------------------------------------------------------------------------------------------------------------------------------------------------------------------------------------------------------------------------------------------------------------------------------------------------------------------------------------------------------------------------------------------------------------------------------------------------------|
| ICS                                      | beclomethasone, fluticasone, budesonide, ciclesonide, mometasone                                                                                                                                                                                                                                                                                                                                                                                                                                                                                                                                                                                                                                                                                                                                                                                                                                                                                                                                                                                                                                                                    |
| LAMA                                     | tiotropium, glycopyrronium, umeclidinium                                                                                                                                                                                                                                                                                                                                                                                                                                                                                                                                                                                                                                                                                                                                                                                                                                                                                                                                                                                                                                                                                            |
| LABA                                     | Salmeterol, formoterol, indacaterol, vilanterol, tulobuterol                                                                                                                                                                                                                                                                                                                                                                                                                                                                                                                                                                                                                                                                                                                                                                                                                                                                                                                                                                                                                                                                        |
| Other medications for COPD               | theophylline, acetylcysteine, ambroxol, carbocisteine, fudosteine, bromhexine, salbutamol, fenoterol, procaterol, ipratropium, oxitropium                                                                                                                                                                                                                                                                                                                                                                                                                                                                                                                                                                                                                                                                                                                                                                                                                                                                                                                                                                                           |
| Drugs used to identify COPD exacerbation |                                                                                                                                                                                                                                                                                                                                                                                                                                                                                                                                                                                                                                                                                                                                                                                                                                                                                                                                                                                                                                                                                                                                     |
| Antimicrobials                           | benzylpenicillin, aspoxicillin, amoxicillin, ampicillin, amoxicillin/clavulanate, bacampicillin, cinoxacin piperacillin, pivmecillinam, sulbactam/ampicillin, tazobactam/piperacillin, ampicillin-cloxacillin, cefroxadine, cefaclor, cefalex, cefalotin, cefazolin, cefuroxime, cefmetazole, cefotiam, flomoxef, cefminox, cefodizime, latamoxef, sulbactam/cefoperazone, cefotaxime, cefoperazone, cefixime, ceftibuten, cefbuperazone, cefcapene pivoxil, cefteram pivoxil, cefpodoxime proxetil, cefteram pivoxil cefpirome, cefmenoxime, cefditoren, ceftazidime, ceftriaxone, cefozopran, cefepime, ceftizoxime, telithromycin, clindamycin, amikacin isepamicin, gentamicin, tobramycin, dibekacin, aztreonam, erythromycin, clarithromycin, azithromycin, josamycin, roxithromycin, aztreonam, tosufloxacin, ofloxacin, garenoxacin, levofloxacin, sitafloxacin, ciprofloxacin, tosufloxacin, norfloxacin, pazufloxacin, prulifloxacin, moxifloxacin, lomefloxacin, faropenem, biapenem, tebipenem pivoxil, panipenem/betamipron, imipenem/cilastatin, doripenem, meropenem, oseltamivir, zanamivir, peramivir, laninamivir |
| Systemic corticosteroids                 | dexamethasone, paramethasone, prednisolone, methylprednisolone, betamethasone, triamcinolone, hydrocortisone                                                                                                                                                                                                                                                                                                                                                                                                                                                                                                                                                                                                                                                                                                                                                                                                                                                                                                                                                                                                                        |

Abbreviations: ICS, inhaled corticosteroids; LAMA, long-acting muscarinic receptor antagonist; LABA, long-acting beta agonist; COPD, chronic obstructive pulmonary disease

**Table S4.** Incident rate ratios and 95% confidence intervals for post-discharge frequency of outpatient antimicrobial and corticosteroid prescriptions in patients with COPD with and without asthma after 1-to-2 PS matching and stabilized IPTW in ICS withdrawal group versus control group

|                    |                | Observation period | IRR      | 95%CI | P           |        |
|--------------------|----------------|--------------------|----------|-------|-------------|--------|
| 1-to-2 PS matching | With asthma    | Antimicrobials     | 30 days  | 0.87  | 0.60 – 1.25 | 0.449  |
|                    |                |                    | 1 year   | 0.73  | 0.53 – 1.00 | 0.047  |
|                    |                | Corticosteroids    | 30 days  | 1.02  | 0.65 – 1.60 | 0.940  |
|                    |                |                    | 1 year   | 0.86  | 0.57 – 1.29 | 0.455  |
|                    | Without asthma | Antimicrobials     | 30 days  | 0.86  | 0.62 – 1.20 | 0.376  |
|                    |                |                    | 1 year   | 0.74  | 0.56 – 0.97 | 0.030  |
|                    |                | Corticosteroids    | 30 days  | 1.22  | 0.77 – 1.93 | 0.394  |
|                    |                |                    | 1 year   | 0.83  | 0.54 – 1.28 | 0.407  |
| Stabilized IPTW    | With asthma    | Antimicrobials     | 30 days  | 1.02  | 0.61 – 1.71 | 0.934  |
|                    |                |                    | 1 year   | 0.69  | 0.49 – 0.96 | 0.030  |
|                    |                | Corticosteroids    | 30 days  | 1.02  | 0.64 – 1.67 | 0.908  |
|                    |                |                    | one year | 0.61  | 0.39 – 0.94 | 0.024  |
|                    | Without asthma | Antimicrobials     | 30 days  | 0.73  | 0.55 – 0.98 | 0.039  |
|                    |                |                    | 1 year   | 0.60  | 0.46 – 0.77 | <0.001 |
|                    |                | Corticosteroids    | 30 days  | 1.15  | 0.80 – 1.65 | 0.456  |
|                    |                |                    | one year | 1.11  | 0.75 – 1.67 | 0.599  |

Abbreviations: COPD, chronic obstructive pulmonary disease; PS, propensity score; IPTW, inverse probability of treatment weighting; IRR, incident rate ratio; CI, confidence interval

**Table S5.** Baseline characteristics of COPD patients aged  $\geq 40$  years with and without ICS withdrawal, before and after 1-to-2 PS matching, and after stabilized IPTW

| Characteristic (categorical)             | All patients   |           |       | 1-to-2 PS matching |           |      | Stabilized IPTW |           |      |
|------------------------------------------|----------------|-----------|-------|--------------------|-----------|------|-----------------|-----------|------|
|                                          | ICS withdrawal | Control   | s.d.  | ICS withdrawal     | Control   | s.d. | ICS withdrawal  | Control   | s.d. |
|                                          | (N=1,091)      | (N=3,307) | (%)   | (N=1,016)          | (N=3,069) | (%)  | (N=872)         | (N=2,591) | (%)  |
| Sex (male)                               | 82.0           | 77.0      | -14.7 | 82.0               | 83.0      | 2.5  | 78.0            | 78.0      | -0.2 |
| Fiscal year                              |                |           |       |                    |           |      |                 |           |      |
| 2010                                     | 3.9            | 10.0      | -24.0 | 3.9                | 4.2       | -1.5 | 7.6             | 8.2       | -2.0 |
| 2011                                     | 9.9            | 16.8      | -20.2 | 9.9                | 10.2      | -1.0 | 16.5            | 14.6      | 5.4  |
| 2012                                     | 13.7           | 20.1      | -17.1 | 13.7               | 14.5      | -2.4 | 19.6            | 17.7      | 4.8  |
| 2013                                     | 17.9           | 18.9      | -2.6  | 17.9               | 17.2      | 1.9  | 15.7            | 18.5      | -7.6 |
| 2014                                     | 24.9           | 19.6      | 12.8  | 24.9               | 25.8      | -0.2 | 21.2            | 21.7      | -1.3 |
| 2015                                     | 29.6           | 14.6      | 36.7  | 29.6               | 28.1      | 3.5  | 19.4            | 19.3      | 0.3  |
| Season at admission                      |                |           |       |                    |           |      |                 |           |      |
| Spring                                   | 23.4           | 24.7      | -3.1  | 23.4               | 21.2      | 5.4  | 25.0            | 24.0      | 2.2  |
| Summer                                   | 23.7           | 22.3      | 3.4   | 23.7               | 26.7      | -6.9 | 23.2            | 23.3      | -0.3 |
| Autumn                                   | 24.5           | 22.9      | 3.8   | 24.5               | 26.2      | -3.8 | 23.6            | 23.7      | -0.4 |
| Winter                                   | 28.3           | 30.1      | -3.8  | 28.3               | 25.9      | 5.4  | 28.3            | 28.9      | -1.4 |
| Residential region                       |                |           |       |                    |           |      |                 |           |      |
| Hokkaido and Tohoku                      | 9.8            | 10.8      | -3.0  | 9.8                | 8.3       | 5.3  | 8.6             | 10.8      | -7.2 |
| Kanto                                    | 31.3           | 35.2      | -8.3  | 31.3               | 31.6      | -0.6 | 36.1            | 33.7      | 5.1  |
| Chubu                                    | 15.5           | 15.2      | 0.8   | 15.5               | 14.9      | 1.5  | 13.9            | 14.7      | -2.2 |
| Kansai                                   | 15.7           | 15.9      | -0.5  | 15.7               | 14.4      | 3.9  | 14.8            | 15.6      | -2.3 |
| Chugoku, Shikoku,<br>Kyushu, and Okinawa | 27.7           | 22.9      | 10.9  | 27.7               | 30.8      | -6.9 | 26.5            | 25.2      | 3.0  |
| Hugh-Jones dyspnea score<br>at admission |                |           |       |                    |           |      |                 |           |      |
| 1                                        | 11.8           | 10.0      | 5.8   | 11.8               | 12.3      | -1.5 | 9.9             | 10.5      | -2.1 |

| 2–3                                                                             | 33.3   |       | 32.9  |       | 0.8   | 33.3   |       | 35.6   |       | -4.9 | 32.4  |       | 33.2  |       | -1.7 |
|---------------------------------------------------------------------------------|--------|-------|-------|-------|-------|--------|-------|--------|-------|------|-------|-------|-------|-------|------|
| 4–5                                                                             | 45.4   |       | 50.9  |       | -11.0 | 45.4   |       | 43.3   |       | 4.2  | 50.2  |       | 49.2  |       | 2.1  |
| Missing                                                                         | 9.5    |       | 6.2   |       | 12.4  | 9.5    |       | 8.8    |       | 2.6  | 7.6   |       | 7.2   |       | 1.4  |
| ADL at admission<br>(Barthel Index score)                                       |        |       |       |       |       |        |       |        |       |      |       |       |       |       |      |
| 100                                                                             | 39.4   |       | 40.0  |       | -1.7  | 39.4   |       | 39.9   |       | -1.1 | 36.6  |       | 40.0  |       | -7.0 |
| 0–90                                                                            | 47.0   |       | 44.4  |       | 5.2   | 47.0   |       | 45.3   |       | 3.5  | 47.8  |       | 45.3  |       | 5.0  |
| Missing                                                                         | 13.9   |       | 15.7  |       | -5.0  | 13.6   |       | 14.8   |       | -3.4 | 15.6  |       | 14.7  |       | 2.5  |
| ADL at discharge<br>(Barthel Index score)                                       |        |       |       |       |       |        |       |        |       |      |       |       |       |       |      |
| 100                                                                             | 58.1   |       | 65.4  |       | -15.2 | 58.1   |       | 57.2   |       | 1.8  | 59.3  |       | 62.9  |       | -7.4 |
| 0–90                                                                            | 33.6   |       | 27.1  |       | 14.1  | 33.6   |       | 32.8   |       | 1.6  | 33.4  |       | 29.2  |       | 9.1  |
| Missing                                                                         | 8.4    |       | 7.5   |       | 3.4   | 8.4    |       | 10.0   |       | -5.6 | 7.3   |       | 7.9   |       | -2.3 |
| Smoking index                                                                   |        |       |       |       |       |        |       |        |       |      |       |       |       |       |      |
| 200–599                                                                         | 9.0    |       | 9.8   |       | -6.8  | 8.9    |       | 10.3   |       | -5.0 | 9.7   |       | 10.0  |       | -0.9 |
| ≥600                                                                            | 49.4   |       | 48.3  |       | 3.9   | 48.7   |       | 47.9   |       | 1.6  | 46.2  |       | 48.0  |       | -3.6 |
| Missing                                                                         | 41.6   |       | 41.9  |       | -0.2  | 42.4   |       | 41.7   |       | 1.4  | 44.1  |       | 42.0  |       | 4.1  |
| Characteristic (numerical)                                                      | Mean   | SD    | Mean  | SD    | s.d.  | Mean   | SD    | Mean   | SD    | s.d. | Mean  | SD    | Mean  | SD    | s.d. |
| Age (years)                                                                     | 75.8   | 9.3   | 73.7  | 9.8   | 22.3  | 75.7   | 9.1   | 76.2   | 8.9   | -5.2 | 75.1  | 9.4   | 74.2  | 9.8   | 8.9  |
| Body mass index (kg/m <sup>2</sup> )                                            | 20.5   | 3.9   | 21.4  | 4.2   | -22.7 | 20.5   | 3.9   | 20.3   | 3.9   | 5.7  | 20.7  | 4.0   | 21.1  | 4.2   | -8.1 |
| Frequency of hospitalization<br>before hospitalization for<br>COPD exacerbation | 0.86   | 1.4   | 0.57  | 1.2   | 20.9  | 0.87   | 1.4   | 0.93   | 1.9   | -3.7 | 0.81  | 1.2   | 0.82  | 2.0   | -0.7 |
| Observation period before<br>hospitalization for COPD<br>exacerbation (days)    | 1048.4 | 579.5 | 837.4 | 569.0 | 35.9  | 1050.6 | 581.1 | 1032.9 | 602.5 | 3.0  | 903.3 | 572.0 | 910.2 | 588.6 | -1.2 |

Abbreviations: ICS, inhaled corticosteroids; PS, propensity score; IPTW, inverse probability of treatment weighting; ADL, activities of daily living; COPD, chronic

obstructive pulmonary disease; s.d., standardized difference; SD, standard deviation

**Table S6.** Comorbidities during hospitalization and treatments for COPD with and without ICS withdrawal, before and after 1-to-2 PS matching, and after stabilized IPTW in patients aged  $\geq 40$  years

| Comorbidity                         | All patients              |                      |             | 1-to-2 PS matching        |                      |             | Stabilized IPTW           |                      |             |
|-------------------------------------|---------------------------|----------------------|-------------|---------------------------|----------------------|-------------|---------------------------|----------------------|-------------|
|                                     | ICS withdrawal<br>(N=971) | Control<br>(N=2,764) | s.d.<br>(%) | ICS withdrawal<br>(N=904) | Control<br>(N=1,808) | s.d.<br>(%) | ICS withdrawal<br>(N=872) | Control<br>(N=2,591) | s.d.<br>(%) |
| Lung cancer                         | 0.14                      | 0.08                 | 20.6        | 0.14                      | 0.16                 | -4.0        | 0.11                      | 0.10                 | 3.4         |
| Other malignancy                    | 0.10                      | 0.06                 | 12.4        | 0.10                      | 0.11                 | -3.4        | 0.07                      | 0.07                 | -1.2        |
| Diabetes/abnormal glucose tolerance | 0.21                      | 0.21                 | 0.8         | 0.21                      | 0.23                 | -5.6        | 0.24                      | 0.21                 | 8.7         |
| Bone fracture/osteoporosis          | 0.07                      | 0.07                 | 0.6         | 0.07                      | 0.07                 | -1.5        | 0.06                      | 0.07                 | -3.9        |
| Interstitial pneumonia              | 0.12                      | 0.05                 | 25.2        | 0.12                      | 0.11                 | 0.5         | 0.07                      | 0.07                 | 2.3         |
| Bronchial asthma                    | 0.37                      | 0.68                 | -64.6       | 0.37                      | 0.39                 | -3.5        | 0.58                      | 0.59                 | -1.5        |
| Bronchiectasis                      | 0.26                      | 0.23                 | 5.7         | 0.26                      | 0.26                 | -0.4        | 0.22                      | 0.23                 | -3.0        |
| Pneumothorax                        | 0.04                      | 0.03                 | 4.3         | 0.04                      | 0.04                 | -1.7        | 0.04                      | 0.04                 | 2.1         |
| Pulmonary thromboembolism           | 0.00                      | 0.01                 | -4.4        | 0.00                      | 0.00                 | -0.9        | 0.00                      | 0.01                 | -0.2        |
| <i>Mycobacterium</i> infection      | 0.03                      | 0.01                 | 10.5        | 0.03                      | 0.03                 | -0.6        | 0.01                      | 0.01                 | -0.8        |
| Mycotic infection                   | 0.02                      | 0.02                 | -0.6        | 0.02                      | 0.02                 | 1.4         | 0.02                      | 0.02                 | 0.5         |
| Cor pulmonale                       | 0.02                      | 0.02                 | 1.0         | 0.02                      | 0.02                 | 3.7         | 0.02                      | 0.02                 | 1.5         |
| Congestive heart failure            | 0.20                      | 0.20                 | 0.3         | 0.20                      | 0.20                 | -0.2        | 0.21                      | 0.20                 | 1.7         |
| Ischemic heart disease              | 0.13                      | 0.12                 | 2.7         | 0.13                      | 0.14                 | -3.3        | 0.16                      | 0.13                 | 8.6         |
| Tachycardia                         | 0.11                      | 0.09                 | 5.7         | 0.11                      | 0.10                 | 3.4         | 0.10                      | 0.10                 | -0.1        |
| Autoimmune disease                  | 0.05                      | 0.03                 | 7.7         | 0.05                      | 0.03                 | 6.9         | 0.04                      | 0.04                 | 2.9         |
| Stroke                              | 0.03                      | 0.02                 | 5.2         | 0.03                      | 0.03                 | 1.8         | 0.02                      | 0.02                 | 0.1         |
| Liver dysfunction                   | 0.03                      | 0.02                 | 5.2         | 0.03                      | 0.03                 | -0.6        | 0.03                      | 0.03                 | 0.7         |
| Renal failure                       | 0.04                      | 0.03                 | 6.3         | 0.04                      | 0.03                 | 3.2         | 0.03                      | 0.03                 | -1.7        |
| GERD                                | 0.20                      | 0.23                 | -5.1        | 0.20                      | 0.22                 | -3.5        | 0.23                      | 0.23                 | -0.2        |
| Constipation or ileus               | 0.16                      | 0.14                 | 4.8         | 0.16                      | 0.18                 | -5.6        | 0.18                      | 0.15                 | 9.1         |
| Prostate hypertrophy                | 0.10                      | 0.09                 | 4.3         | 0.10                      | 0.11                 | -1.6        | 0.10                      | 0.09                 | 1.4         |
| Treatment                           | ×100 (%)                  | ×100 (%)             | s.d.        | ×100 (%)                  | ×100 (%)             | s.d.        | ×100 (%)                  | ×100 (%)             | s.d.        |

| Before hospitalization               |      |      |       |      |      |      |      |      |      |
|--------------------------------------|------|------|-------|------|------|------|------|------|------|
| Home ventilatory support             | 0.02 | 0.02 | -1.3  | 0.02 | 0.02 | -3.0 | 0.03 | 0.02 | 5.9  |
| Home oxygen therapy                  | 0.26 | 0.27 | -2.6  | 0.26 | 0.26 | -1.8 | 0.30 | 0.27 | 6.7  |
| Both LAMA and LABA                   | 0.24 | 0.20 | 10.5  | 0.24 | 0.22 | -4.0 | 0.24 | 0.21 | 6.0  |
| LAMA only                            | 0.59 | 0.66 | -13.5 | 0.59 | 0.58 | 2.4  | 0.65 | 0.65 | 0.3  |
| LABA only                            | 0.46 | 0.35 | 21.3  | 0.46 | 0.46 | 0.2  | 0.42 | 0.39 | 5.9  |
| SABA or SAMA                         | 0.43 | 0.58 | -31.3 | 0.43 | 0.42 | 0.8  | 0.55 | 0.53 | 3.0  |
| Theophylline                         | 0.31 | 0.48 | -36.2 | 0.31 | 0.30 | 2.6  | 0.45 | 0.43 | 4.3  |
| Expectorants                         | 0.75 | 0.76 | -0.8  | 0.75 | 0.71 | 9.9  | 0.72 | 0.75 | -7.0 |
| Antibiotic prescriptions per 30 days | 0.25 | 0.31 | -9.6  | 0.25 | 0.22 | 5.6  | 0.28 | 0.29 | -1.5 |
| Macrolides per 30 days               | 0.12 | 0.19 | -16.7 | 0.12 | 0.11 | 1.9  | 0.14 | 0.16 | -3.7 |
| TMP/SMX combination per 30 days      | 0.03 | 0.03 | 3.9   | 0.03 | 0.02 | 6.7  | 0.02 | 0.03 | -2.6 |
| Anti-MRSA drugs per 30 days          | 0.00 | 0.00 | 5.5   | 0.00 | 0.00 | 1.8  | 0.00 | 0.00 | 2.1  |
| Antifungal agent per 30 days         | 0.00 | 0.00 | 3.1   | 0.00 | 0.00 | -4.5 | 0.00 | 0.00 | 3.8  |
| Medication for flu per 30 days       | 0.00 | 0.00 | -5.1  | 0.00 | 0.00 | 0.4  | 0.00 | 0.00 | -1.5 |
| Oral corticosteroids per 30 days     | 0.12 | 0.20 | -16.7 | 0.12 | 0.12 | 0.1  | 0.16 | 0.17 | -1.9 |
| i.v. corticosteroids per 30 days     | 0.06 | 0.16 | -15.4 | 0.06 | 0.07 | -3.4 | 0.11 | 0.14 | -3.5 |
| At and during hospitalization        |      |      |       |      |      |      |      |      |      |
| Ambulance transport                  | 0.22 | 0.23 | -3.1  | 0.22 | 0.21 | 2.5  | 0.21 | 0.23 | -3.9 |
| ICU admission                        | 0.01 | 0.03 | -7.6  | 0.01 | 0.02 | -3.8 | 0.03 | 0.03 | 2.2  |
| Corticosteroids                      | 0.39 | 0.61 | -45.1 | 0.39 | 0.37 | 3.4  | 0.52 | 0.54 | -3.9 |
| Aminoglycosides                      | 0.01 | 0.01 | -2.7  | 0.01 | 0.01 | -4.4 | 0.01 | 0.01 | -3.9 |
| Carbapenems                          | 0.14 | 0.13 | 3.4   | 0.14 | 0.15 | -2.1 | 0.15 | 0.13 | 5.1  |
| Anti-MRSA drugs                      | 0.02 | 0.01 | 5.6   | 0.02 | 0.03 | -4.3 | 0.04 | 0.02 | 12.2 |
| Macrolides                           | 0.24 | 0.34 | -20.9 | 0.24 | 0.25 | -1.7 | 0.29 | 0.30 | -2.0 |
| Fluoroquinolones                     | 0.29 | 0.30 | -1.3  | 0.29 | 0.29 | 0.5  | 0.30 | 0.29 | 1.3  |
| Mechanical ventilation               | 0.06 | 0.06 | -1.6  | 0.06 | 0.07 | -5.6 | 0.09 | 0.07 | 7.8  |
| Hemodialysis                         | 0.01 | 0.01 | 6.4   | 0.01 | 0.01 | 4.5  | 0.01 | 0.01 | -1.1 |
| Nasal tube feeding                   | 0.01 | 0.01 | 3.3   | 0.01 | 0.02 | -4.1 | 0.03 | 0.01 | 12.9 |



|                                  |      |      |       |      |      |      |      |      |      |      |
|----------------------------------|------|------|-------|------|------|------|------|------|------|------|
| Surgery under general anesthesia | 0.00 | 0.01 | -0.9  | 0.00 | 0.00 | 1.5  | 0.00 | 0.01 | -2.9 |      |
| Prescription of LABA/LAMA        | 0.05 | 0.01 | 24.9  | 0.05 | 0.04 | 5.4  | 0.02 | 0.03 | -2.8 |      |
| Prescription of LAMA             | 0.25 | 0.60 | -75.1 | 0.25 | 0.25 | 0.2  | 0.50 | 0.50 | 0.4  |      |
| Prescription of LABA             | 0.26 | 0.19 | 16.7  | 0.26 | 0.27 | -0.8 | 0.26 | 0.22 | 9.1  |      |
| Discharge to home                | 0.93 | 0.97 | -21.1 | 0.93 | 0.92 | 3.1  | 0.94 | 0.95 | -1.1 |      |
| Treatment (numerical)            | Mean | SD   | Mean  | SD   | s.d. | Mean | SD   | Mean | SD   | s.d. |
| Length of stay                   | 19.2 | 19.6 | 18.8  | 15.9 | 3.4  | 19.3 | 19.9 | 20.3 | 18.0 | -5.6 |
|                                  | 19.1 | 20.8 | 19.0  | 15.4 | 4.8  |      |      |      |      |      |

Abbreviations: PS, propensity score; IPTW, inverse probability of treatment weighting; GERD, gastro-esophageal reflux disease; ICS, inhaled corticosteroids; LAMA, long-acting muscarinic receptor antagonist; LABA, long-acting beta agonist; LABA/LAMA; fixed-dose long-acting bronchodilator combination in single inhaler; SABA, short-acting beta-agonist; SAMA, short-acting muscarinic receptor antagonist; TMP/SMX, trimethoprim-sulfamethoxazole combination; i.v., intravenous injection; ICU, intensive care unit; MRSA, methicillin-resistant *Staphylococcus aureus*; s.d., standardized difference; SD, standard deviation

**Table S7.** HRs and 95% CIs of re-hospitalization for COPD exacerbation or death after 1-to-2 PS matching and stabilized IPTW in the ICS withdrawal group versus control group in patients aged  $\geq 40$  years

|                    |                  | Re-hospitalization or death |         |      |           |       |
|--------------------|------------------|-----------------------------|---------|------|-----------|-------|
|                    | Study population | ICS withdrawal              | Control | HR   | 95% CI    | P     |
| 1-to-2 PS matching | All              | 1,016                       | 2,032   | 0.74 | 0.61–0.91 | 0.005 |
|                    | $\geq 70$ years  | 784                         | 1,591   | 0.70 | 0.55–0.89 | 0.003 |
|                    | $< 70$ years     | 232                         | 441     | 0.95 | 0.64–1.40 | 0.786 |
| Stabilized IPTW    | All              | 931                         | 3,162   | 0.75 | 0.61–0.94 | 0.012 |
|                    | $\geq 70$ years  | 680                         | 2,273   | 0.65 | 0.50–0.84 | 0.001 |
|                    | $< 70$ years     | 251                         | 890     | 1.11 | 0.73–1.70 | 0.627 |

Abbreviations: PS, propensity score; ICS, inhaled corticosteroids; COPD, chronic obstructive pulmonary disease; IPTW, inverse probability of treatment weighting; HR, hazard ratio; CI, confidence interval

**Table S8.** IRRs and 95% CIs for post-discharge frequency of outpatient antimicrobial and corticosteroid prescriptions in two age groups ( $\geq 70$  years vs.  $< 70$  years) after 1-to-2 PS matching and stabilized IPTW in the ICS withdrawal group versus control group in the sensitivity analyses for COPD patients aged  $\geq 40$  years

|                       |                 |                 | Observation period | IRR  | 95% CI    | P     |
|-----------------------|-----------------|-----------------|--------------------|------|-----------|-------|
| 1-to-2 PS<br>matching | $\geq 70$ years | Antimicrobials  | 30 days            | 0.82 | 0.62–1.09 | 0.168 |
|                       |                 |                 | 1 year             | 0.64 | 0.50–0.83 | 0.001 |
|                       |                 | Corticosteroids | 30 days            | 0.96 | 0.65–1.44 | 0.860 |
|                       |                 |                 | 1 year             | 0.71 | 0.53–0.96 | 0.028 |
|                       | $< 70$ years    | Antimicrobials  | 30 days            | 1.47 | 0.90–2.41 | 0.124 |
|                       |                 |                 | 1 year             | 0.94 | 0.64–1.41 | 0.793 |
|                       |                 | Corticosteroids | 30 days            | 1.34 | 0.86–2.10 | 0.192 |
|                       |                 |                 | 1 year             | 1.02 | 0.68–1.55 | 0.909 |
| Stabilized<br>IPTW    | $\geq 70$ years | Antimicrobials  | 30 days            | 0.93 | 0.62–1.40 | 0.718 |
|                       |                 |                 | 1 year             | 0.63 | 0.49–0.83 | 0.001 |
|                       |                 | Corticosteroids | 30 days            | 0.95 | 0.64–1.41 | 0.814 |
|                       |                 |                 | one year           | 0.70 | 0.50–0.98 | 0.036 |
|                       | $< 70$ years    | Antimicrobials  | 30 days            | 0.89 | 0.63–1.28 | 0.553 |
|                       |                 |                 | 1 year             | 0.68 | 0.48–0.95 | 0.025 |
|                       |                 | Corticosteroids | 30 days            | 1.11 | 0.75–1.64 | 0.616 |
|                       |                 |                 | 1 year             | 0.77 | 0.50–1.19 | 0.242 |

Abbreviations: COPD, chronic obstructive pulmonary disease; PS, propensity score; IPTW, inverse probability of treatment weighting; IRR, incident rate ratio; CI, confidence interval

## FIGURE LEGENDS

**Figure S1.** Cumulative hazard curves for hospitalization for re-exacerbation or death after hospitalization for exacerbation in patients with chronic obstructive pulmonary disease (COPD) aged  $\geq 65$  years with or without ICS withdrawal. Results for **(A)** 1-to-2 propensity score-matched population; and **(B)** stabilized inverse probability of treatment weighted population. ICS, inhaled corticosteroids

**Figure S2.** Cumulative hazard curves for hospitalization for re-exacerbation or death after hospitalization for exacerbation in patients with chronic obstructive pulmonary disease (COPD) aged  $\geq 40$  years with or without ICS withdrawal. Results for the 1-to-2 propensity score-matched population are shown. **(A)** All patients. **(B)** Patients aged  $\geq 70$  years. **(C)** Patients aged  $< 70$  years. ICS, inhaled corticosteroids

**Figure S3.** Cumulative hazard curves for hospitalization for re-exacerbation or death after hospitalization for exacerbation in patients with chronic obstructive pulmonary disease (COPD) aged  $\geq 40$  years with or without ICS withdrawal. Results for the stabilized inverse probability of treatment weighted population are shown. **(A)** All patients. **(B)** Patients aged  $\geq 70$  years. **(C)** Patients aged  $< 70$  years. ICS, inhaled corticosteroids
